# Supplementary material for: Systematic Evaluation of Parameters Important for Production of Native Toxin A and Toxin B from Clostridioides difficile
Source: PubMed Central journal article supplement (PMC8066640; doi:10.3390/toxins13040240), 2021-03-27
Supplement: toxins-13-00240-s001.pdf [file toxins-13-00240-s001.pdf]

## Supplementary Materials: Systematic Evaluation of Parameters Important for Production of Native Toxin A and Toxin B from *Clostridioides difficile*

Aria Aminzadeh and René Jørgensen

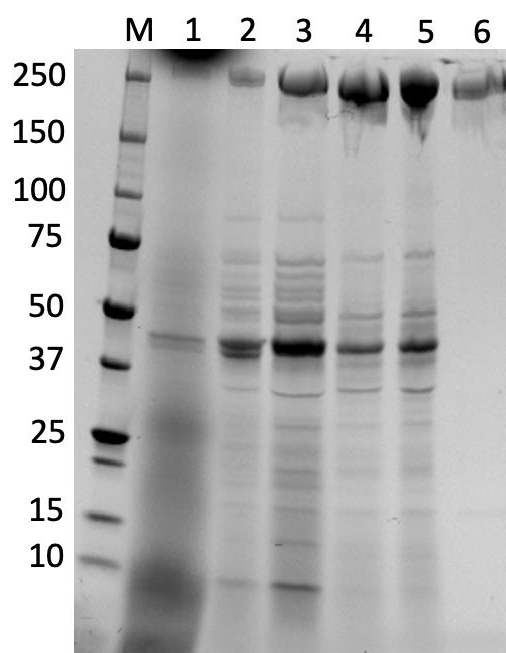

**Figure S1.** SDS-PAGE showing purity of TcdA after each purification step. lane M: molecular weight markers (kDa), lane 1: filtered culture supernatant (stage 1), lane 2: diafiltrated culture supernatant containing TcdA and TcdB (stage 2), lane 3: TcdA after Q Sepharose (stage 3), lane 4: TcdA after MonoQ (stage 4), lane 5: TcdA after ultrafiltration/concentration (stage 5), lane 6: TcdA after Superdex 200 (stage 6). Purity of TcdA was estimated from the SDS-PAGE using Image Lab 6.1 software (Bio-Rad, Hercules, CA, USA, 2019). after each purification step and is as follows; stage 2: 7.9%, stage 3: 34%, stage 4: 72.5%, stage 5: 72.5%, stage 6: >99%.

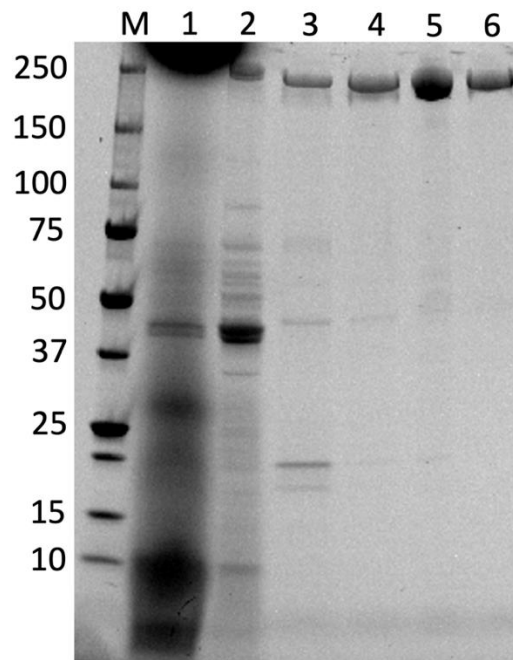

**Figure S2.** SDS-PAGE showing purity of TcdB after each purification step. lane M: molecular weight markers (kDa), lane 1: filtered culture supernatant (stage 1), lane 2: diafiltrated culture supernatant containing TcdA and TcdB (stage 2), lane 3: TcdB after Q Sepharose (stage 3), lane 4: TcdB after MonoQ (stage 4), lane 5: TcdB after ultrafiltration/concentration (stage 5), lane 6: TcdB after Superdex 200 (stage 6). Purity of TcdB was estimated from the SDS-PAGE using Image Lab 6.1 software after each purification step and is as follows; stage 2: 3.9%, stage 3: 65.6%, stage 4: 95.2%, stage 5: 98%, stage 6: >99%.

**Table S1.** TY<sup>opt</sup> supports increased toxin production in *C. difficile* strain VPI 10463.

| Culture Medium    | <i>C. difficile</i> Strain | pH  | OD <sub>600</sub> | TcdB (ng/mL)                     |
|-------------------|----------------------------|-----|-------------------|----------------------------------|
| TY <sup>opt</sup> | R20291                     | 7.5 | 0.98              | 3980 (3660–4851) ( <i>n</i> = 6) |
| TY <sup>opt</sup> | VPI 10463                  | 7.5 | 1.83              | 3757 (3557–4434) ( <i>n</i> = 3) |

All cultures were grown in 50 mL TY<sup>opt</sup> media and incubated unagitated for 3 days at 37 °C with OD<sub>600</sub> measured on day 3.

**Table S2.** The effect of various HEPES and NaCl concentrations on the thermal stability of TcdA.

| HEPES (mM) | NaCl (mM) | $T_m$ (°C) |
|------------|-----------|------------|
| 50         | 0         | 48.2       |
| 50         | 125       | 51.4       |
| 50         | 250       | 52.8       |
| 50         | 500       | 53.7       |
| 50         | 750       | 53.7       |
| 50         | 1000      | 54.0       |
| 100        | 0         | 48.9       |
| 100        | 125       | 51.3       |
| 100        | 250       | 52.5       |
| 100        | 500       | 53.5       |
| 100        | 750       | 53.6       |
| 100        | 1000      | 53.4       |
| 200        | 0         | 49.6       |
| 200        | 125       | 51.2       |
| 200        | 250       | 52.2       |
| 200        | 500       | 53.8       |
| 200        | 750       | 54.5       |
| 200        | 1000      | 54.0       |
| 300        | 0         | 50.0       |
| 300        | 125       | 51.6       |
| 300        | 250       | 52.6       |
| 300        | 500       | 53.9       |
| 300        | 750       | 54.4       |
| 300        | 1000      | 54.9       |

Thermal stability was measured by DSF using real-time PCR. HEPES was adjusted to pH 7.5 for all conditions.

**Table S3.** The effect of various salts added to 100 mM HEPES on the thermal stability of TcdA.

| Salt               | Concentration (mM) | $T_m$ (°C) |
|--------------------|--------------------|------------|
| NaCl               | 100                | 51.1       |
| NaCl               | 500                | 52.8       |
| NH <sub>4</sub> Cl | 100                | 51.7       |
| NH <sub>4</sub> Cl | 500                | 52.5       |
| MgSO <sub>4</sub>  | 100                | 53.7       |
| MgSO <sub>4</sub>  | 500                | 54.6       |

Thermal stability was measured by DSF using real-time PCR. TcdA was buffered in 100 mM HEPES (pH 7.5) for all conditions.

**Table S4.** The effect of MgSO<sub>4</sub> and glutamic acid on the thermal stability of TcdA.

| MgSO <sub>4</sub> (mM) | Glutamic Acid (mM) | T <sub>m</sub> (°C) |
|------------------------|--------------------|---------------------|
| 0                      | 0                  | 49.5                |
| 250                    | 0                  | 54.0                |
| 500                    | 0                  | 54.1                |
| 0                      | 250                | 52.8                |
| 0                      | 500                | 54.6                |
| 250                    | 250                | 55.4                |
| 250                    | 500                | 56.5                |
| 500                    | 250                | 53.9                |
| 500                    | 500                | 56.7                |

Thermal stability was measured by DSF using real-time PCR. TcdA was buffered in 100 mM HEPES (pH 7.5) for all conditions.

**Table S5.** The effect of various HEPES and NaCl concentrations on the thermal stability of TcdB.

| HEPES (mM) | NaCl (mM) | T <sub>m</sub> (°C) |
|------------|-----------|---------------------|
| 50         | 0         | 46.7                |
| 50         | 125       | 51.5                |
| 50         | 250       | 51.6                |
| 50         | 500       | 51.0                |
| 50         | 750       | 50.2                |
| 50         | 1000      | 49.7                |
| 100        | 0         | 49.0                |
| 100        | 125       | 51.4                |
| 100        | 250       | 51.4                |
| 100        | 500       | 51.2                |
| 100        | 750       | 51.2                |
| 100        | 1000      | 49.7                |
| 200        | 0         | 50.2                |
| 200        | 125       | 51.2                |
| 200        | 250       | 51.1                |
| 200        | 500       | 51.2                |
| 200        | 750       | 50.3                |
| 200        | 1000      | 49.6                |
| 300        | 0         | 50.7                |
| 300        | 125       | 51.1                |
| 300        | 250       | 50.3                |
| 300        | 500       | 49.7                |
| 300        | 750       | 48.8                |
| 300        | 1000      | 48.9                |

Thermal stability was measured by DSF using real-time PCR. HEPES was adjusted to pH 7.0 for all conditions.

**Table S6.** The effect of various salts added to 100 mM HEPES on the thermal stability of TcdB.

| Salt               | Salt Conc (mM) | $T_m$ (°C) |
|--------------------|----------------|------------|
| NaCl               | 250            | 51.9       |
| NaCl               | 500            | 51.5       |
| NH <sub>4</sub> Cl | 250            | 50.8       |
| NH <sub>4</sub> Cl | 500            | 49.4       |
| MgSO <sub>4</sub>  | 250            | 49.7       |
| MgSO <sub>4</sub>  | 500            | 49.5       |
| NaSO <sub>4</sub>  | 100            | 52.5       |

Thermal stability was measured by DSF using real-time PCR. TcdB was buffered in 100 mM HEPES (pH 7.0) for all conditions.

**Table S7.** The effect of NaSO<sub>4</sub> and glutamic acid on the thermal stability of TcdB.

| NaSO <sub>4</sub> (mM) | Glutamic Acid (mM) | $T_m$ (°C) |
|------------------------|--------------------|------------|
| 0                      | 0                  | 45.2       |
| 250                    | 0                  | 52.1       |
| 0                      | 250                | 52.1       |
| 0                      | 500                | 52.9       |
| 250                    | 250                | 53.1       |
| 250                    | 500                | 52.9       |

Thermal stability was measured by DSF using real-time PCR. TcdB was buffered in 100 mM HEPES (pH 7.0) for all conditions. .
